# Supplementary material for: Racial, Ethnic, and Socioeconomic Differences in Food Allergies in the US
Source: PubMed Central journal article supplement (PMC10267771; doi:10.1001/jamanetworkopen.2023.18162), 2023-06-14

## Supplementary Online Content

Jiang J, Warren CM, Brewer A, Soffer G, Gupta RS. Racial, ethnic, and socioeconomic differences in food allergies in the US. *JAMA Netw Open*. 2023;6(6):e2318162.  
doi:10.1001/jamanetworkopen.2023.18162

**eFigure.** Prevalence of Convincing and Physician-Confirmed Food Allergy by Age, Estimated Across Racial, Ethnic, and Household Income Strata

This supplementary material has been provided by the authors to give readers additional information about their work.

**eFigure.** Prevalence of Convincing and Physician-Confirmed Food Allergy by Age, Estimated Across Racial, Ethnic, and Household Income Strata

Prevalence of Any Convincing FA By Age and Race/Ethnicity

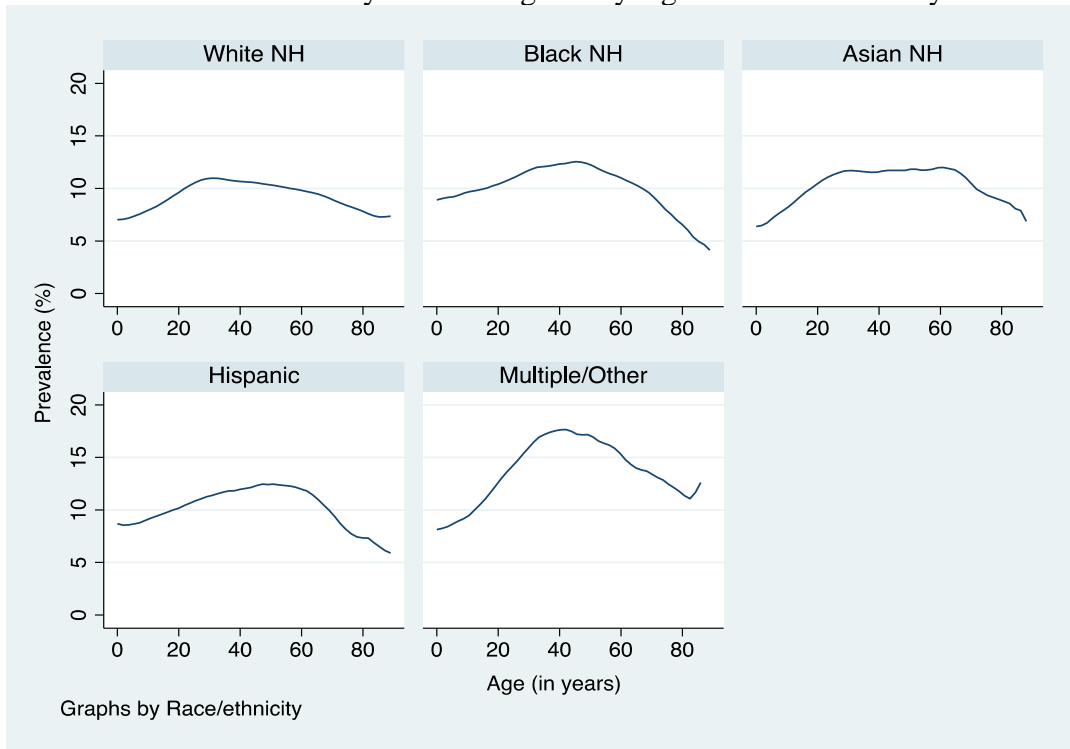

Prevalence of Any Confirmed FA By Age and Race/Ethnicity

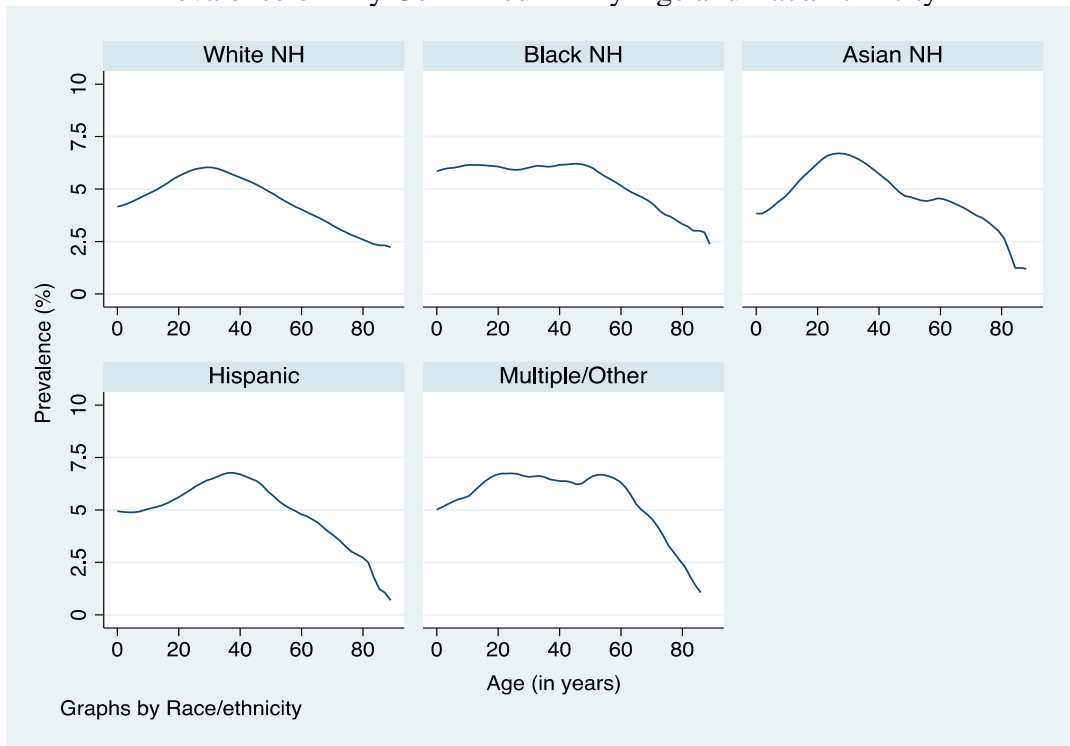

## Prevalence of Any Convincing FA By Age and Annual Household Income

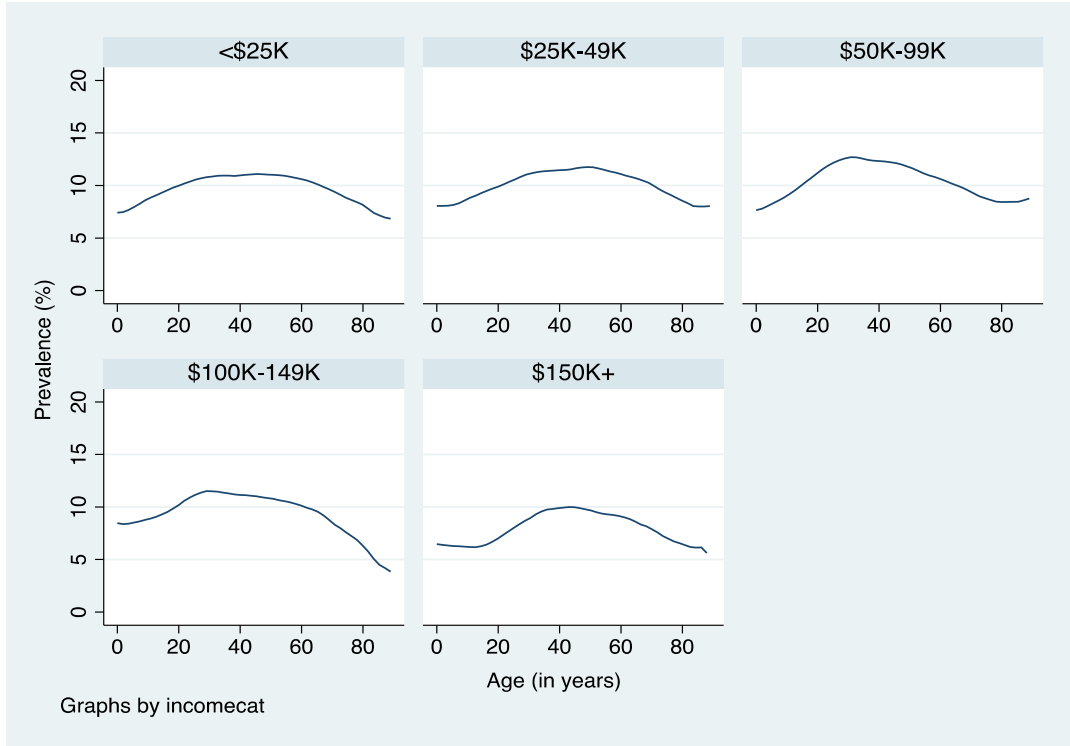

## Prevalence of Any Confirmed FA By Age and Annual Household Income

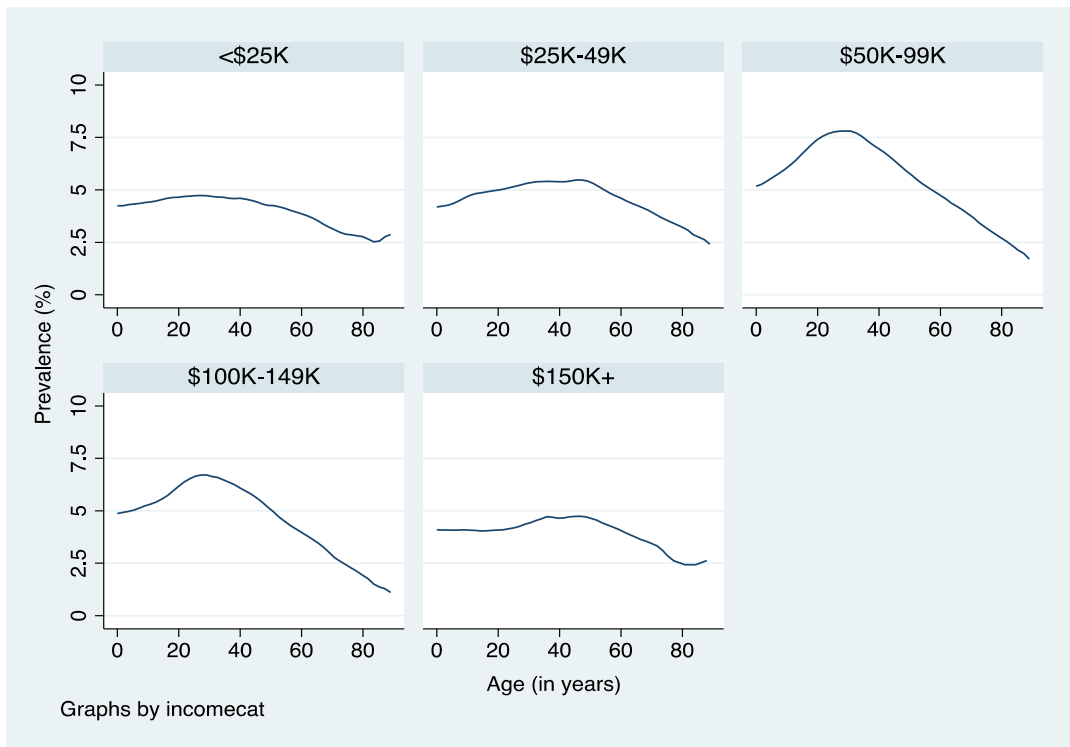

Supplement: jamanetwopen-e2318162-s001.pdf [file jamanetwopen-e2318162-s001.pdf]
