# Supplementary material for: Racial, Ethnic, and Socioeconomic Differences in Food Allergies in the US
Source: PubMed Central journal article supplement (PMC10267771; doi:10.1001/jamanetworkopen.2023.18162), 2023-06-14
Supplement: jamanetwopen-e2318162-s002.pdf [file jamanetwopen-e2318162-s002.pdf]

## Data Sharing Statement

Jiang. Racial, Ethnic, and Socioeconomic Differences in Food Allergies in the US. *JAMA Netw Open*. Published June 14, 2023. doi:10.1001/jamanetworkopen.2023.18162

### Data

**Data available:** No
